# Supplementary material
Source: Springer Nature journal article supplement (https://www.springermedizin.de/resource/supplementary/12937_2012_595_MOESM3_ESM.pdf/25653900)

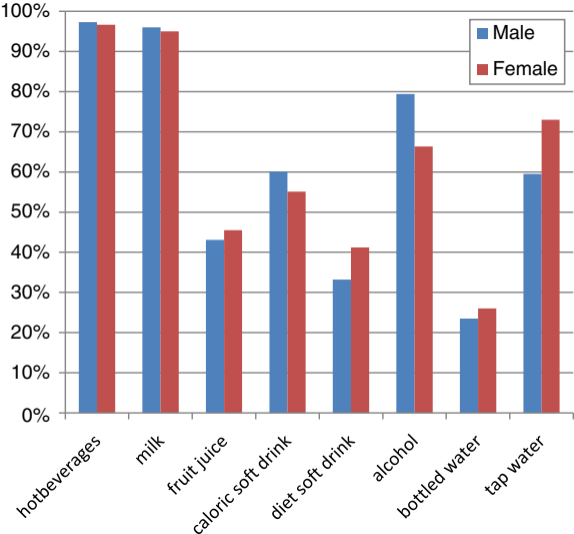

Supplement: MOESM3 [file 25653900]
